# Supplementary material for: Cardiomyocyte overexpression of miR-27b induces cardiac hypertrophy and dysfunction in mice
Source: PubMed Central journal article supplement — Cell Res. 2011 Aug 16;22(3):516–27. doi: 10.1038/cr.2011.132 (PMC3292295; doi:10.1038/cr.2011.132), 2011-08-16
Supplement: cr2011132x1.pdf [file cr2011132x1.pdf]

## Supplementary information, Figure S1

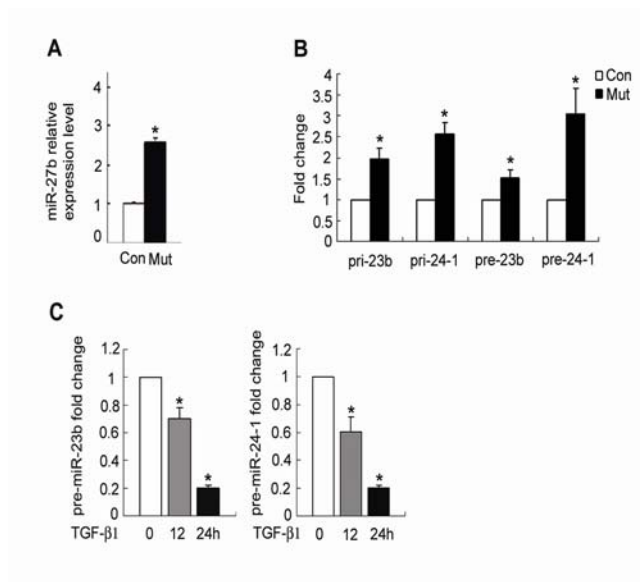

**Figure S1** miR-27b was regulated by TGF- $\beta$ 1. **(A)** Real-time PCR results showed that mature miR-27b was elevated in hearts of Smad4 mutant mice. **(B)** pri-miR-23b, pri-miR-24-1, pre-miR-23b and pre-miR-24-1 were increased in Smad4 mutant hearts. **(C)** pre-miR-23b and pre-miR-24-1 were decreased in cardiomyocytes treated with TGF- $\beta$ 1 for 12 h and 24 h.
