# Supplementary material for: Cardiomyocyte overexpression of miR-27b induces cardiac hypertrophy and dysfunction in mice
Source: PubMed Central journal article supplement — Cell Res. 2011 Aug 16;22(3):516–27. doi: 10.1038/cr.2011.132 (PMC3292295; doi:10.1038/cr.2011.132), 2011-08-16
Supplement: cr2011132x2.pdf [file cr2011132x2.pdf]

## Supplementary information, Figure S2

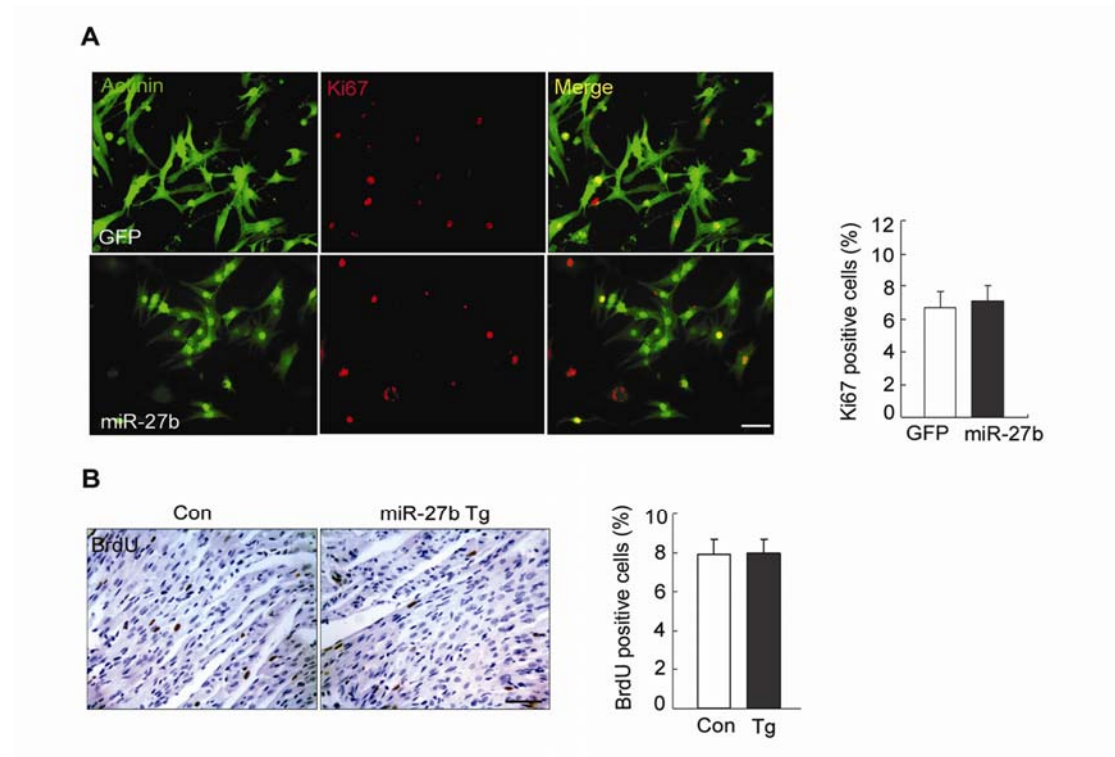

**Figure S2** Effect of miR-27b overexpression on cardiomyocyte proliferation. **(A)** Cell proliferation assay by Ki67 immunostaining on cardiomyocytes infected with Ad-GFP or Ad-miR-27b. Scale bar, 50  $\mu$ m. Right: Quantitative analysis of proliferation index of cardiomyocytes infected by adenovirus ( $n = 500$  cells per condition). **(B)** Cell proliferation assay by BrdU labeling from P5 mice. Scale bar, 25  $\mu$ m. Right: Quantification of BrdU positive cells in the hearts of control and miR-27b Tg mice (1600 cells from 3 mice were calculated per genotype).
