# Supplementary material for: Cardiomyocyte overexpression of miR-27b induces cardiac hypertrophy and dysfunction in mice
Source: PubMed Central journal article supplement — Cell Res. 2011 Aug 16;22(3):516–27. doi: 10.1038/cr.2011.132 (PMC3292295; doi:10.1038/cr.2011.132), 2011-08-16
Supplement: cr2011132x3.pdf [file cr2011132x3.pdf]

## Supplementary information, Figure S3

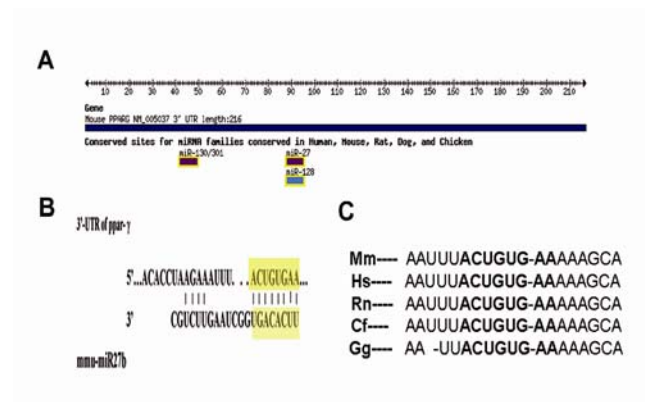

**Figure S3** PPAR- $\gamma$  was the target of miR-27b. **(A)** TargetScan analysis demonstrated that PPAR- $\gamma$  might be the target of miR-27b. **(B)** PPAR- $\gamma$  mRNA 3'UTR sites targeted by miR-27b. **(C)** PPAR- $\gamma$  mRNA 3'UTR is highly conserved among different species.
