# Supplementary material for: Cardiomyocyte overexpression of miR-27b induces cardiac hypertrophy and dysfunction in mice
Source: PubMed Central journal article supplement — Cell Res. 2011 Aug 16;22(3):516–27. doi: 10.1038/cr.2011.132 (PMC3292295; doi:10.1038/cr.2011.132), 2011-08-16
Supplement: cr2011132x4.pdf [file cr2011132x4.pdf]

## Supplementary information, Figure S4

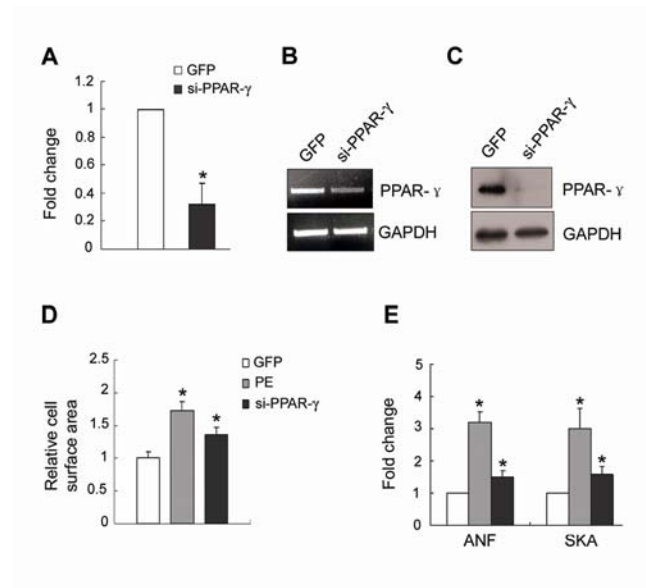

**Figure S4** Interference of PPAR- $\gamma$  in cardiomyocytes induced cell hypertrophy. (A-C) Real-time PCR, RT-PCR and western blot analysis showed that Ad-si-PPAR- $\gamma$  could downregulate PPAR- $\gamma$  expression. (D) Fold change in mean cell surface area of cardiomyocytes ( $n = 100$  cells per condition). (E) ANF and SKA transcripts were checked by real-time PCR. \* $P < 0.05$  relative to respective controls.
