# Supplementary material for: Cardiomyocyte overexpression of miR-27b induces cardiac hypertrophy and dysfunction in mice
Source: PubMed Central journal article supplement — Cell Res. 2011 Aug 16;22(3):516–27. doi: 10.1038/cr.2011.132 (PMC3292295; doi:10.1038/cr.2011.132), 2011-08-16
Supplement: cr2011132x5.pdf [file cr2011132x5.pdf]

## Supplementary information, Figure S5

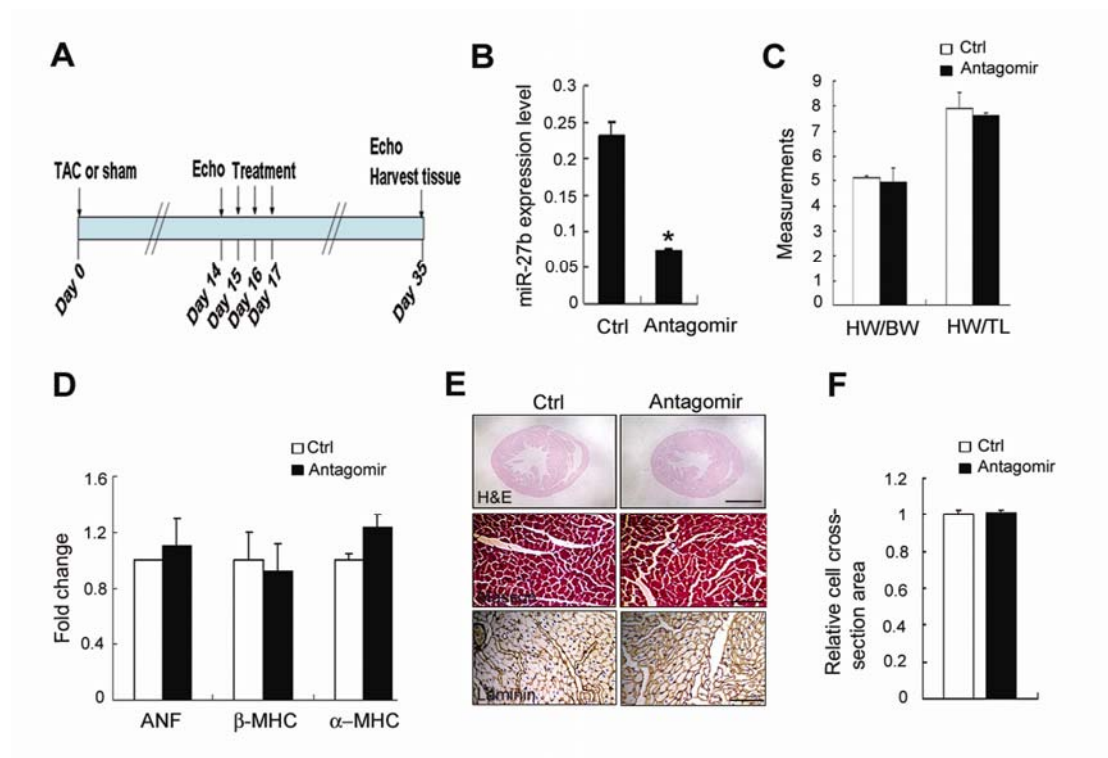

**Figure S5** Design of therapeutic study. **(A)** TAC surgeries were performed on male C57BL/6 mice (8 weeks old). Treatments started 2 weeks after TAC, and animals received 0.2 ml saline (Ctrl) or antagomir-27b (3 injections in 3 consecutive days, 80 mg per kg body weight) via tail vein injections. After three weeks, the mice were killed for analysis. **(B)** Expression of mature mir-27b in mice treated with saline (Ctrl) or antagomir-27b (Antagomir) was examined by real-time PCR ( $n = 3$  mice per group). **(C)** Heart weight to body weight or tibia length from mice treated with saline ( $n = 5$ ) or antagomir-27b ( $n = 4$ ). **(D)** Analysis of ANF,  $\beta$ -MHC and  $\alpha$ -MHC in hearts from different groups by real-time PCR ( $n = 3$  per condition). **(E)** Histological analysis of hearts using H&E, masson staining and laminin immunostaining. Scale bar, upper panel: 1.5 mm, middle and lower panel: 37.5  $\mu$ m. **(F)** Cross-sectional areas were analyzed after laminin immunostaining ( $n = 300$  cells per condition).
