# Supplementary material for: Cardiomyocyte overexpression of miR-27b induces cardiac hypertrophy and dysfunction in mice
Source: PubMed Central journal article supplement — Cell Res. 2011 Aug 16;22(3):516–27. doi: 10.1038/cr.2011.132 (PMC3292295; doi:10.1038/cr.2011.132), 2011-08-16
Supplement: cr2011132x6.pdf [file cr2011132x6.pdf]

**Supplementary information, Table S1 Echocardiographic characterization of miR-27b transgenic mice**

|                                          | 3 Mon                 |                        | 6 Mon                 |                        |
|------------------------------------------|-----------------------|------------------------|-----------------------|------------------------|
|                                          | wild type mice<br>N=5 | miR-27b Tg mice<br>N=8 | wild type mice<br>N=9 | miR-27b Tg mice<br>N=8 |
| LV internal diameter in diastole, mm     | 3.33 ± 0.14           | 3.63 ± 0.08            | 3.57 ± 0.10           | 3.95 ± 0.11*           |
| Posterior wall thickness in diastole, mm | 0.84 ± 0.05           | 0.78 ± 0.03            | 0.99 ± 0.05           | 0.84 ± 0.02 *          |
| LV internal diameter in systole, mm      | 2.08 ± 0.10           | 2.51 ± 0.11*           | 2.25 ± 0.10           | 2.79 ± 0.13 *          |
| Posterior wall thickness in systole, mm  | 1.22 ± 0.06           | 1.07 ± 0.03 *          | 1.38 ± 0.07           | 1.15 ± 0.04 *          |
| Anterior wall thickness in diastole, mm  | 0.84 ± 0.02           | 0.82 ± 0.03            | 0.93 ± 0.03           | 0.87 ± 0.02            |
| Anterior wall thickness in systole, mm   | 1.16 ± 0.06           | 1.14 ± 0.06            | 1.29 ± 0.05           | 1.18 ± 0.04            |
| LV volume in diastole, mm                | 45.86 ± 4.75          | 55.94 ± 2.94           | 54.09 ± 3.57          | 68.75 ± 4.19 *         |
| LV volume in systole, mm                 | 15.69 ± 1.45          | 23.10 ± 2.76           | 17.74 ± 1.96          | 30.28 ± 3.43 *         |
| Ejection fraction , %                    | 68.57 ± 1.63          | 59.33 ± 3.17           | 67.35 ± 2.80          | 56.42 ± 3.75 *         |
| Fraction shortening, %                   | 37.53 ± 1.28          | 31.16 ± 2.07 *         | 37.06 ± 2.18          | 29.45 ± 2.33 *         |
| LV mass to body weight                   | 4.43 ± 0.26           | 5.44 ± 0.32 *          | 4.36 ± 0.14           | 4.90 ± 0.16 *          |

The results presented are means ± SEM. \**P* < 0.05 versus control mice.
