# Supplementary material for: Cardiomyocyte overexpression of miR-27b induces cardiac hypertrophy and dysfunction in mice
Source: PubMed Central journal article supplement — Cell Res. 2011 Aug 16;22(3):516–27. doi: 10.1038/cr.2011.132 (PMC3292295; doi:10.1038/cr.2011.132), 2011-08-16
Supplement: cr2011132x7.pdf [file cr2011132x7.pdf]

**Supplementary information, Table S2 Hemodynamic characterization of miR-27b transgenic mice**

|                                           | 3 Mon            |                  | 6 Mon            |                  |
|-------------------------------------------|------------------|------------------|------------------|------------------|
|                                           | wild type mice   | miR-27b Tg mice  | wild type mice   | miR-27b Tg mice  |
|                                           | N=5              | N=8              | N=8              | N=8              |
| Systolic blood pressure, mmHg             | 84.92 ± 3.48     | 93.38 ± 3.39     | 80.23 ± 4.94     | 93.56 ± 4.21     |
| Diastolic blood pressure, mmHg            | 58.92 ± 4.62     | 68.67 ± 3.07     | 55.77 ± 4.69     | 64.83 ± 4.82     |
| Mean arterial blood pressure, mmHg        | 67.58 ± 3.82     | 76.90 ± 3.22     | 63.94 ± 4.75     | 74.41 ± 4.58     |
| LV systolic end pressure, mmHg            | 86.08 ± 4.60     | 92.23 ± 4.07     | 86.60 ± 4.15     | 95.13 ± 3.78     |
| LV diastolic end pressure, mmHg           | 3.90 ± 0.26      | 6.10 ± 0.76 *    | 3.60 ± 0.93      | 6.20 ± 0.59 *    |
| Maximum change in pressure/change in time | 7275.00 ± 696.52 | 7055.70 ± 243.13 | 6881.00 ± 547.35 | 6596.12 ± 455.73 |
| Minimum change in pressure/change in time | 5481.10 ± 365.85 | 6405.15 ± 291.32 | 5533.51 ± 589.77 | 5742.36 ± 543.39 |

The results presented are means ± SEM. \**P* < 0.05 versus control mice.
