# Supplementary material for: Cardiomyocyte overexpression of miR-27b induces cardiac hypertrophy and dysfunction in mice
Source: PubMed Central journal article supplement — Cell Res. 2011 Aug 16;22(3):516–27. doi: 10.1038/cr.2011.132 (PMC3292295; doi:10.1038/cr.2011.132), 2011-08-16
Supplement: cr2011132x8.pdf [file cr2011132x8.pdf]

**Supplementary information, Table S3 Echocardiographic characterization of mice treated with antagomir-27b**

|                                          | Sham         | TAC              |                              |
|------------------------------------------|--------------|------------------|------------------------------|
|                                          |              | Ctrl             | Antagomir-27b                |
|                                          | N=11         | N=8              | N=5                          |
| LV internal diameter in diastole, mm     | 3.86 ± 0.09  | 4.07 ± 0.13      | 3.94 ± 0.08                  |
| Posterior wall thickness in diastole, mm | 0.66 ± 0.01  | 0.96 ± 0.04 *    | 0.77 ± 0.24 *, <sup>a</sup>  |
| LV internal diameter in systole, mm      | 2.85 ± 0.08  | 3.07 ± 0.14      | 2.99 ± 0.11                  |
| Posterior wall thickness in systole, mm  | 1.00 ± 0.02  | 1.30 ± 0.03 *    | 1.14 ± 0.02 *, <sup>a</sup>  |
| Anterior wall thickness in diastole, mm  | 0.67 ± 0.01  | 0.94 ± 0.03 *    | 0.77 ± 0.03 *, <sup>a</sup>  |
| Anterior wall thickness in systole, mm   | 1.08 ± 0.01  | 1.30 ± 0.03 *    | 1.15 ± 0.06 <sup>a</sup>     |
| LV volume in diastole, mm                | 64.93 ± 3.40 | 73.74 ± 5.50     | 67.53 ± 3.38                 |
| LV volume in systole, mm                 | 31.27 ± 2.22 | 37.89 ± 4.13     | 35.13 ± 3.40                 |
| Ejection fraction , %                    | 52.18 ± 1.41 | 49.42 ± 2.37     | 48.41 ± 2.78                 |
| Fraction shortening, %                   | 26.70 ± 0.73 | 22.09 ± 0.47 *   | 25.43 ± 1.48 <sup>a</sup>    |
| LV mass, mg                              | 69.86 ± 2.96 | 126.78 ± 10.89 * | 87.27 ± 6.23 *, <sup>a</sup> |

The results presented are means ± SEM. \**P* < 0.05 versus sham-operated mice, <sup>a</sup>*P* < 0.05 vs TAC-operated mice treated with saline.
